# Supplementary material
Source: PubMed Central journal article supplement (PMC9017174)
Supplement: mmc1.pdf [file mmc1.pdf]

**Cell Reports Methods, Volume 1**

**Supplemental information**

**A high-content platform  
for physiological profiling and unbiased  
classification of individual neurons**

**Daniel M. DuBreuil, Brenda M. Chiang, Kevin Zhu, Xiaofan Lai, Patrick Flynn, Yechiam Sapir, and Brian J. Wainger**

Supplementary Figures 1-6

Fluo4 Segmented cells

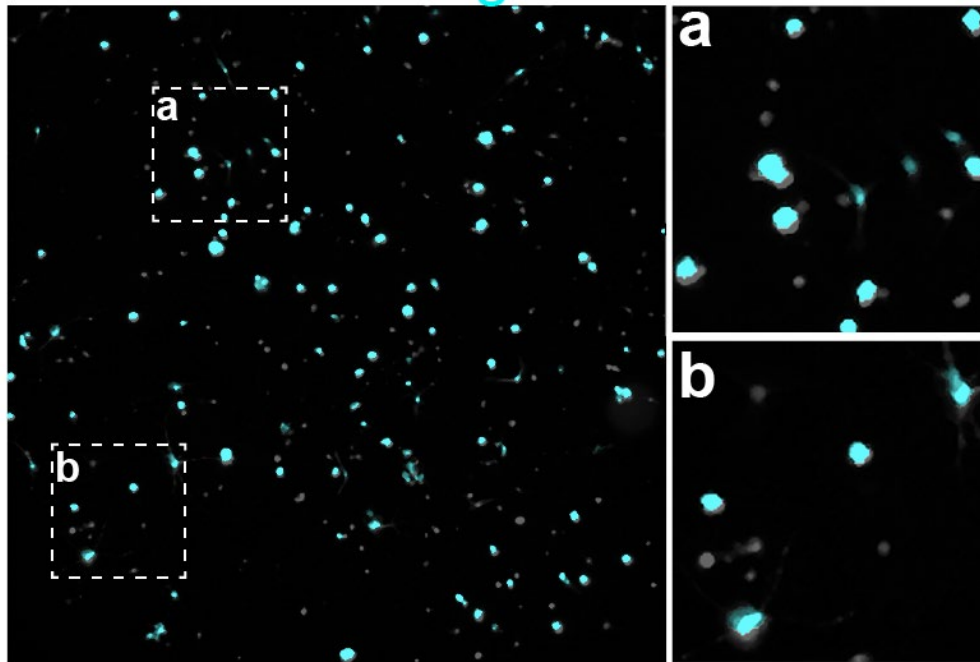

**Supplementary Figure 1. Results of automated cell segmentation,** Related to Figure 1. Example image of Fluo4 signal (white) and results of automated segmentation (cyan) for one well. Time-lapse image stacks of Fluo4 signal are projected into a single image using minimum pixel intensity to remove cells that move during imaging. The projection image is blurred using a gaussian filter and an automatic global threshold applied to identify objects.

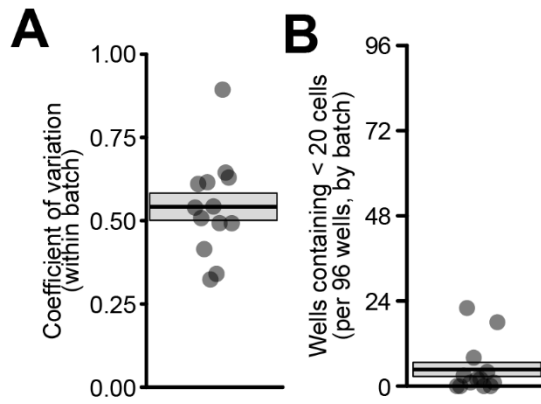

**Supplementary Figure 2. Neurons are evenly distributed across individual plates with few low-density wells, Related to Figure 1.**

**A**, Coefficient of variation within each plate (points), along with mean and SEM (box,  $0.542 \pm 0.041$ ).

**B**, Wells per 96-well batch with fewer than 20 cells per well (points), along with mean and SEM (box,  $4.7 \pm 2.0$  wells per 96-well batch).

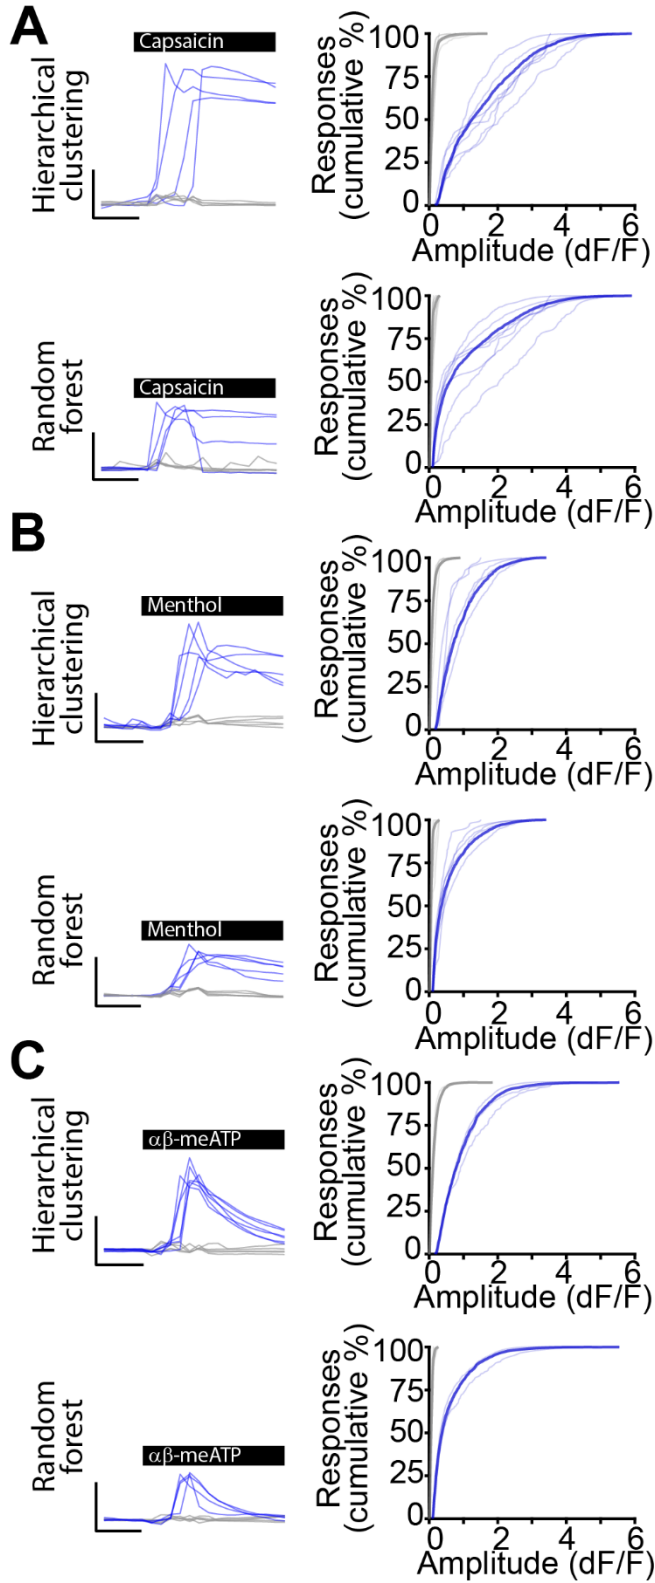

**Supplementary Figure 3. Unbiased classification of responses to Trp and purinergic receptor agonists,** Related to Figure 2. Classification of calcium responses following application of **A**, capsaicin, **B**, menthol, and **C**, meATP by hierarchical clustering (top) and random forest machine learning (bottom) approaches. Each panel shows example traces of calcium responses classified as positive (blue) and negative (grey) (left, scale bars 5 s and 0.5 dF/F) along with cumulative distributions of positive (blue) and negative (grey) response amplitudes (right).

SS=saline-sensitive; NS=not sensitive;  
KS=KCl-sensitive, saline-insensitive

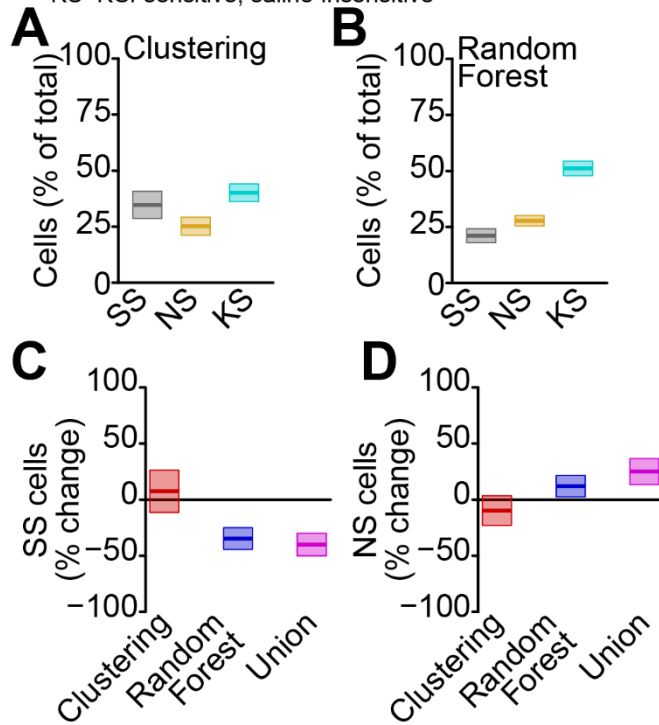

**Supplementary Figure 4.**  
**Comparison of individual, unbiased approaches for quantification of cell types**, Related to Figure 2. **A-B**, Percentage of cells classified as SS (grey), NS (orange), and KS (cyan) using hierarchical clustering (**A**) or random forest classifiers (**B**). **C-D**, Percent change from threshold-based analysis in percentage of SS cells (**C**) or NS cells (**D**) using hierarchical clustering (red) or random forest (blue) classifiers alone or the union of both approaches (magenta).

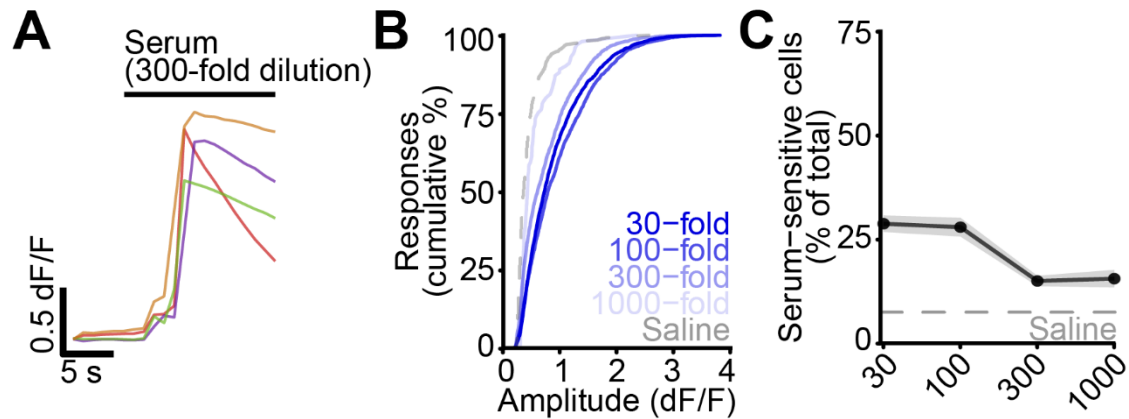

**Supplementary Figure 5. Activation of primary mouse sensory neurons by human serum samples**, Related to figure 5.

**A**, Example traces of positive responses to serum (300-fold dilution, colors indicate individual cells, scale bars 5 s and 0.5 dF/F).

**B**, Cumulative distributions of positive response amplitudes following stimulation by serum dilutions (as fold dilution, orange), along with meATP (dashed green line) and saline (dashed grey line). Analysis includes cells sensitive to initial saline stimulus.

**C**, Dose-response curve of sensory neuron activation by serum as mean (points/lines) and SEM (shaded area), along with saline-dependent activation (dashed line). Analysis includes cells sensitive to initial saline stimulus.

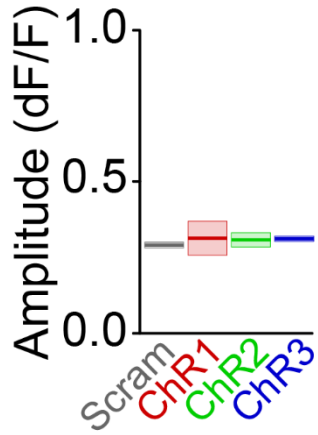

**Supplementary Figure 6. Effect of ChR-targeting ASOs on amplitude of optogenetic responses**, Related to Figure 6. Average response amplitude of positive responses following optical stimulation after seven-day treatment by ChR2-targeting ASOs (red, green, blue) or scrambled control ASO (grey) as mean and SEM.

## Supplementary Tables 1-2

| Accuracy<br>[95% confidence interval] |     | Test batch          |                     |                     |                     |                     |                     |                     |                     |                     |                     |
|---------------------------------------|-----|---------------------|---------------------|---------------------|---------------------|---------------------|---------------------|---------------------|---------------------|---------------------|---------------------|
|                                       |     | #1                  | #2                  | #3                  | #4                  | #5                  | #6                  | #7                  | #8                  | #9                  | #10                 |
| Training batch                        | #1  |                     | 92.5<br>[92.92.9]   | 96.1<br>[95.9,96.3] | 85.3<br>[84.5,86.1] | 80.1<br>[79.81.1]   | 80.1<br>[79.4,80.8] | 86<br>[85.5,86.6]   | 80.5<br>[79.6,81.4] | 79.9<br>[79.4,80.3] | 77.7<br>[77.2,78.2] |
|                                       | #2  | 94.5<br>[94.2,94.7] |                     | 95.1<br>[94.9,95.4] | 83.2<br>[82.3,84]   | 81.6<br>[80.6,82.5] | 81.8<br>[81.1,82.5] | 86.1<br>[85.5,86.6] | 80.8<br>[79.9,81.7] | 84.3<br>[83.9,84.7] | 81.1<br>[80.6,81.6] |
|                                       | #3  | 96.6<br>[96.4,96.8] | 93.1<br>[92.7,93.5] |                     | 81.8<br>[80.9,82.6] | 79.6<br>[78.6,80.6] | 74.8<br>[74.1,75.6] | 86.2<br>[85.7,86.7] | 79.8<br>[78.8,80.7] | 76.6<br>[76.1,77.1] | 77.8<br>[77.3,78.3] |
|                                       | #4  | 94.4<br>[94.2,94.7] | 91<br>[90.5,91.5]   | 94.2<br>[93.9,94.4] |                     | 86.7<br>[85.8,87.6] | 91.6<br>[91.1,92.1] | 90.9<br>[90.5,91.3] | 89.4<br>[88.7,90.1] | 89.8<br>[89.4,90.1] | 92.8<br>[92.5,93.1] |
|                                       | #5  | 94.6<br>[94.3,94.8] | 93.3<br>[92.8,93.7] | 95.9<br>[95.6,96.1] | 92.2<br>[91.6,92.8] |                     | 88.7<br>[88.1,89.2] | 91.5<br>[91.1,91.9] | 87.5<br>[86.7,88.2] | 90.1<br>[89.7,90.4] | 86.5<br>[86.1,86.9] |
|                                       | #6  | 91.7<br>[91.4,92.1] | 91<br>[89.5,91.5]   | 90.1<br>[89.7,90.4] | 93.6<br>[93.94.1]   | 85.7<br>[84.8,86.6] |                     | 92.9<br>[92.5,93.2] | 88.5<br>[87.7,89.2] | 94.6<br>[94.3,94.8] | 89.5<br>[89.1,89.9] |
|                                       | #7  | 91.9<br>[91.6,92.2] | 89.7<br>[89.1,90.2] | 92.8<br>[92.5,93.1] | 91.5<br>[90.9,92.1] | 85.4<br>[84.4,86.2] | 92.8<br>[92.4,93.3] |                     | 86.5<br>[85.7,87.2] | 91.9<br>[91.6,92.2] | 86.3<br>[85.8,86.7] |
|                                       | #8  | 95.1<br>[94.8,95.3] | 92<br>[91.5,92.4]   | 96.2<br>[95.9,96.4] | 88.9<br>[88.2,89.6] | 82.1<br>[81.1,83.1] | 85.5<br>[84.9,86.2] | 87.9<br>[87.4,88.4] |                     | 85.3<br>[84.9,85.7] | 86<br>[85.6,86.4]   |
|                                       | #9  | 92.4<br>[92.1,92.7] | 92.4<br>[91.9,92.8] | 93.1<br>[92.8,93.4] | 93.5<br>[93.94]     | 87<br>[86.1,87.8]   | 95.7<br>[95.3,96.1] | 93.5<br>[93.1,93.9] | 89.9<br>[89.2,90.5] |                     | 90.1<br>[89.7,90.5] |
|                                       | #10 | 74<br>[73.5,74.6]   | 81.2<br>[80.5,81.9] | 68.6<br>[68,69.1]   | 84.6<br>[83.8,85.4] | 77.9<br>[76.9,79]   | 75.3<br>[74.5,76]   | 84.2<br>[83.6,84.7] | 90.1<br>[89.4,90.7] | 78.6<br>[78.2,79.1] |                     |

**Supplementary Table 1. Robust classification of responses across neuronal batches,** Related to Figure 2. Accuracy and 95% confidence intervals for pairwise classification of individual test batches using random forest models trained on independent single batches. All accuracy values are statistically significant with  $p < 5 \times 10^{-100}$ .

| Gene    | Class/Type    | Nociceptor Enrichment |          | DRG specificity |          | Effect of Injury |          | Agonist        |           |                      | Ref (PMID) |
|---------|---------------|-----------------------|----------|-----------------|----------|------------------|----------|----------------|-----------|----------------------|------------|
|         |               | logFC                 | p-value  | logFC           | p-value  | logFC            | p-value  | Name           | Source    | Dose                 |            |
| Il13ra1 | cytokine      | 2.6540                | 6.87E-07 | -1.4900         | 3.35E-01 | 0.6329           | 1.42E-09 | IL-13          | Sigma     | 1 / 10 / 100 ng/mL   | 19383494   |
| Il31ra  | cytokine      | 3.3072                | 3.31E-07 | 4.4350          | 1.61E-09 | 0.0905           | 3.63E-01 | IL-31          | Sigma     | 0.1 / 1 / 10 ng/mL   | 24373353   |
| Il6st   | cytokine      | 0.9212                | 4.61E-07 | 2.9300          | 6.86E-02 | 0.0986           | 3.75E-01 | IL-6           | Sigma     | 0.1 / 1 / 10 ng/mL   | 32519575   |
| Lifr    | cytokine      | 0.5511                | 1.28E-04 | 3.6500          | 6.48E-03 | 0.0241           | 3.88E-01 | LIF            | Sigma     | 0.1 / 1 / 10 ng/mL   | 10380072   |
| Gfra3   | growth factor | 3.2960                | 5.97E-08 | 4.0600          | 1.49E-62 | 0.4092           | 6.48E-04 | GDNF           | Life Tech | 10 / 50 / 100 ng/mL  | 22704965   |
| Ngfr    | growth factor | 0.8134                | 7.06E-04 | 7.9100          | 1.77E-48 | -0.0094          | 8.63E-01 | NGF            | R&D       | 10 / 100 / 500 ng/mL | 30211336   |
| Ptgd    | lipid         | 2.7043                | 2.52E-07 | 2.0500          | 7.39E-36 | 0.0495           | 6.38E-01 | AMG 853        | Tocris    | 20 / 200 / 2000 nM   | 24900313   |
| Ptgir   | lipid         | 2.3355                | 1.20E-04 | 4.6800          | 8.02E-04 | -0.2397          | 6.62E-04 | Treprostinil   | Tocris    | 2 / 20 / 200 nM      | 22480736   |
| S1pr3   | lipid         | 0.5829                | 2.60E-03 | 5.5000          | 5.38E-05 | -0.0127          | 7.46E-01 | CYM 5541       | Tocris    | 0.1 / 1 / 10 μM      | 22971058   |
| Lpar3   | lipid         | 1.9022                | 1.55E-06 | 6.5600          | 1.69E-13 | -0.1790          | 9.17E-02 | 1-Oleoyl LPA   | Tocris    | 2 / 20 / 200 μM      | 15353230   |
| Ptger3  | lipid         | 1.7593                | 1.92E-07 | 1.2191          | 4.87E-01 | 0.0502           | 3.66E-01 | Sulprostone    | Tocris    | 5 / 50 / 500 ng/mL   | 17700719   |
| Galr1   | peptide       | 3.7567                | 1.85E-08 | -0.0122         | 7.02E-01 | -0.0169          | 5.74E-01 | Galanin        | Tocris    | 5 / 50 / 500 nM      | 19006083   |
| Npy2r   | peptide       | 4.0898                | 4.26E-09 | 4.6400          | 1.14E-06 | 0.2926           | 3.13E-03 | YY (3-36)      | Tocris    | 5 / 50 / 500 ng/mL   | 29157865   |
| Sstr2   | peptide       | 2.8811                | 2.07E-06 | 1.7200          | 7.23E-02 | 0.0528           | 1.77E-01 | L-054,264      | Tocris    | 5 / 50 / 500 nM      | 9632348    |
| Cckbr   | peptide       | 0.5116                | 1.05E-01 | -0.4085         | 7.18E-01 | 2.8349           | 3.77E-12 | Gastrin I      | Tocris    | 5 / 50 / 500 ng/mL   | 8476056    |
| F2rl2   | peptide       | 2.4652                | 8.26E-07 | 3.2450          | 9.35E-11 | -0.1263          | 7.52E-02 | Thrombin       | Tocris    | 0.5 / 5 / 50 μg/mL   | 11487506   |
| Agtr1a  | peptide       | 2.7214                | 2.58E-06 | 3.6800          | 5.69E-02 | -0.0873          | 1.43E-01 | Angiotensin II | Tocris    | 5 / 50 / 500 ng/mL   | 23255326   |
| Ret     | RTK           | 0.7972                | 5.73E-07 | 8.3500          | 2.46E-14 | 0.1147           | 1.46E-01 | XIB-4035       | Sigma     | 10 / 100 / 1000 μM   | 12441171   |

**Supplementary Table 2. Pool of metabotropic receptor agonists from *in silico* analysis of transcriptomic datasets,** Related to Figure 4.
